# Supplementary material for: Lifespan Extension by Preserving Proliferative Homeostasis in Drosophila
Source: PubMed Central journal article supplement (PMC2954830; doi:10.1371/journal.pgen.1001159), 2010-10-14
Supplement: pgen.1001159.s010.pdf [file pgen.1001159.s010.pdf]

| Genotype                          | <i>n</i> | Mean<br>Lifespan | percent<br>extension | ChiSquare |          | p-value  |          |
|-----------------------------------|----------|------------------|----------------------|-----------|----------|----------|----------|
|                                   |          |                  |                      | Log Rank  | Wilcoxon | Log Rank | Wilcoxon |
| Males                             |          |                  |                      |           |          |          |          |
| esgG4, G80 <sup>ts</sup> >        |          |                  |                      |           |          |          |          |
| Ctrl ( <i>w</i> <sup>1118</sup> ) | 493      | 26.9             |                      |           |          |          |          |
| Hep <sup>WT</sup>                 | 445      | 25.2             | <b>-6.3%</b>         | 153       | 140      | <.0001   | <.0001   |
| InR <sup>WT</sup>                 | 321      | 25.2             | <b>-6.3%</b>         | 138       | 127      | <.0001   | <.0001   |
| Bsk <sup>RNAi</sup>               | 439      | 22.5             | <b>-16.4%</b>        | 657       | 594      | <.0001   | <.0001   |
| Females                           |          |                  |                      |           |          |          |          |
| esgG4, G80 <sup>ts</sup> >        |          |                  |                      |           |          |          |          |
| Ctrl ( <i>w</i> <sup>1118</sup> ) | 473      | 26.4             |                      |           |          |          |          |
| Hep <sup>WT</sup>                 | 376      | 24.9             | <b>-5.7%</b>         | 83        | 79       | <.0001   | <.0001   |
| InR <sup>WT</sup>                 | 310      | 23.7             | <b>-10.2%</b>        | 199       | 164      | <.0001   | <.0001   |
| Bsk <sup>RNAi</sup>               | 301      | 23.7             | <b>-10.2%</b>        | 307       | 265      | <.0001   | <.0001   |
