# Supplementary material for: Lifespan Extension by Preserving Proliferative Homeostasis in Drosophila
Source: PubMed Central journal article supplement (PMC2954830; doi:10.1371/journal.pgen.1001159), 2010-10-14
Supplement: pgen.1001159.s011.pdf [file pgen.1001159.s011.pdf]

| Genotype                                             | <i>n</i> | Mean<br>Lifespan | percent<br>extension | ChiSquare |          | p-value  |          |
|------------------------------------------------------|----------|------------------|----------------------|-----------|----------|----------|----------|
|                                                      |          |                  |                      | Log Rank  | Wilcoxon | Log Rank | Wilcoxon |
| Males                                                |          |                  |                      |           |          |          |          |
| esgG4, G80 <sup>ts</sup> >                           |          |                  |                      |           |          |          |          |
| Ctrl ( <i>w</i> <sup>1118</sup> )                    | 333      | 27.2             |                      |           |          |          |          |
| Akt <sup>RNAi</sup>                                  | 339      | 24.1             | <b>-11.4%</b>        | 325       | 283      | <.0001   | <.0001   |
| Ctrl ( <i>y</i> <sup>1</sup> <i>w</i> <sup>1</sup> ) | 357      | 28.2             |                      |           |          |          |          |
| Foxo                                                 | 394      | 26.4             | <b>-6.4%</b>         | 160       | 145      | <.0001   | <.0001   |
| Dp110 <sup>DN</sup>                                  | 380      | 27.4             | <b>-2.8%</b>         | 47        | 42       | <.0001   | <.0001   |
| Females                                              |          |                  |                      |           |          |          |          |
| esgG4, G80 <sup>ts</sup> >                           |          |                  |                      |           |          |          |          |
| Ctrl ( <i>w</i> <sup>1118</sup> )                    | 263      | 27.2             |                      |           |          |          |          |
| Akt <sup>RNAi</sup>                                  | 351      | 25.2             | <b>-7.4%</b>         | 161       | 136      | <.0001   | <.0001   |
| Ctrl ( <i>y</i> <sup>1</sup> <i>w</i> <sup>1</sup> ) | 373      | 27.8             |                      |           |          |          |          |
| Foxo                                                 | 373      | 26.6             | <b>-4%</b>           | 75        | 74       | <.0001   | <.0001   |
| Dp110 <sup>DN</sup>                                  | 337      | 26.5             | <b>-5%</b>           | 69        | 61       | <.0001   | <.0001   |
