# Supplementary material for: Lifespan Extension by Preserving Proliferative Homeostasis in Drosophila
Source: PubMed Central journal article supplement (PMC2954830; doi:10.1371/journal.pgen.1001159), 2010-10-14
Supplement: pgen.1001159.s012.pdf [file pgen.1001159.s012.pdf]

esgGal4 > + (y<sup>1</sup>w<sup>1</sup>/w<sup>1118</sup> outcrossed background)

| Population | Sex     | Genotype                 | n   | Mean Lifespan | 25% dead      | 75% dead      | ChiSquare |          | p-value           |                   |
|------------|---------|--------------------------|-----|---------------|---------------|---------------|-----------|----------|-------------------|-------------------|
|            |         |                          |     |               |               |               | Log Rank  | Wilcoxon | Log Rank          | Wilcoxon          |
| A          | Males   | + > +                    | 35  | 47.3          | 40            | 57            | 0.7       | 0.1      | 0.38              | 0.73              |
|            |         | esgGal4 > +              | 83  | 47.3          | 42            | 55            |           |          |                   |                   |
|            |         | <i>percent extension</i> |     | <b>0.0%</b>   | <b>5.0%</b>   | <b>-3.5%</b>  |           |          |                   |                   |
|            | Females | + > +                    | 54  | 53.3          | 47            | 61            | 1.2       | 1.8      | 0.28              | 0.17              |
|            |         | esgGal4 > +              | 101 | 51.2          | 45            | 59            |           |          |                   |                   |
|            |         | <i>percent extension</i> |     | <b>-3.9%</b>  | <b>-4.3%</b>  | <b>-3.3%</b>  |           |          |                   |                   |
| B          | Males   | + > +                    | 64  | 45.1          | 38            | 51            | 6.4       | 8.4      | <b>0.01</b>       | <b>0.004</b>      |
|            |         | esgGal4 > +              | 94  | 50.2          | 42            | 55            |           |          |                   |                   |
|            |         | <i>percent extension</i> |     | <b>11.3%</b>  | <b>10.5%</b>  | <b>7.8%</b>   |           |          |                   |                   |
|            | Females | + > +                    | 46  | 46.3          | 34            | 53            | 0.1       | 0.2      | 0.72              | 0.66              |
|            |         | esgGal4 > +              | 93  | 45.8          | 40            | 55            |           |          |                   |                   |
|            |         | <i>percent extension</i> |     | <b>-1.1%</b>  | <b>17.6%</b>  | <b>3.8%</b>   |           |          |                   |                   |
| C          | Males   | + > +                    | 46  | 47.2          | 42            | 53            | 0.7       | 4.6      | 0.03              | 0.03              |
|            |         | esgGal4 > +              | 78  | 44            | 38            | 49            |           |          |                   |                   |
|            |         | <i>percent extension</i> |     | <b>-6.8%</b>  | <b>-9.5%</b>  | <b>-7.5%</b>  |           |          |                   |                   |
|            | Females | + > +                    | 50  | 48.5          | 45            | 53            | 0.2       | 0.2      | 0.62              | 0.62              |
|            |         | esgGal4 > +              | 69  | 47.8          | 42            | 55            |           |          |                   |                   |
|            |         | <i>percent extension</i> |     | <b>-1.4%</b>  | <b>-6.7%</b>  | <b>3.8%</b>   |           |          |                   |                   |
| D          | Males   | + > +                    | 64  | 45.4          | 38            | 53            | 21.4      | 12.3     | <b>&lt;0.0001</b> | <b>0.0004</b>     |
|            |         | esgGal4 > +              | 107 | 39.7          | 38            | 45            |           |          |                   |                   |
|            |         | <i>percent extension</i> |     | <b>-12.6%</b> | <b>0.0%</b>   | <b>-15.1%</b> |           |          |                   |                   |
|            | Females | + > +                    | 70  | 42.7          | 36            | 53            | 2         | 6.2      | 0.15              | <b>0.01</b>       |
|            |         | esgGal4 > +              | 99  | 46.4          | 42            | 51            |           |          |                   |                   |
|            |         | <i>percent extension</i> |     | <b>8.7%</b>   | <b>16.7%</b>  | <b>-3.8%</b>  |           |          |                   |                   |
| E          | Males   | + > +                    | 62  | 45.7          | 40            | 53            | 12        | 24.6     | <b>0.005</b>      | <b>&lt;0.0001</b> |
|            |         | esgGal4 > +              | 93  | 38.2          | 30            | 45            |           |          |                   |                   |
|            |         | <i>percent extension</i> |     | <b>-16.4%</b> | <b>-25.0%</b> | <b>-15.1%</b> |           |          |                   |                   |
|            | Females | + > +                    | 68  | 45.6          | 38            | 53            | 0.7       | 2        | 0.38              | 0.16              |
|            |         | esgGal4 > +              | 78  | 43.5          | 38            | 51            |           |          |                   |                   |
|            |         | <i>percent extension</i> |     | <b>-4.6%</b>  | <b>0.0%</b>   | <b>-3.8%</b>  |           |          |                   |                   |
| F          | Males   | + > +                    | 49  | 44.7          | 38            | 51            | 1         | 5        | 0.3               | 0.02              |
|            |         | esgGal4 > +              | 118 | 48.4          | 45            | 55            |           |          |                   |                   |
|            |         | <i>percent extension</i> |     | <b>8.3%</b>   | <b>18.4%</b>  | <b>7.8%</b>   |           |          |                   |                   |
|            | Females | + > +                    | 57  | 36.2          | 28            | 40            | 5.7       | 16.3     | 0.02              | <b>&lt;0.0001</b> |
|            |         | esgGal4 > +              | 105 | 41.7          | 36            | 47            |           |          |                   |                   |
|            |         | <i>percent extension</i> |     | <b>15.2%</b>  | <b>28.6%</b>  | <b>17.5%</b>  |           |          |                   |                   |
| Total      | Males   | + > +                    | 320 | 45.8          | 38            | 53            | 3.6       | 3.7      | <b>0.06</b>       | <b>0.05</b>       |
|            |         | esgGal4 > +              | 573 | 44.7          | 38            | 53            |           |          |                   |                   |
|            |         | <i>percent extension</i> |     | <b>-2.4%</b>  | <b>0.0%</b>   | <b>0.0%</b>   |           |          |                   |                   |
|            | Females | + > +                    | 345 | 45.2          | 36            | 53            | 0.1       | 0.5      | <b>0.79</b>       | <b>0.44</b>       |
|            |         | esgGal4 > +              | 545 | 46            | 40            | 53            |           |          |                   |                   |
|            |         | <i>percent extension</i> |     | <b>1.8%</b>   | <b>11.1%</b>  | <b>0.0%</b>   |           |          |                   |                   |

esgGal4 > Foxo ( $y^1 w^1 / w^{1118}$  outcrossed background)

| Population | Sex     | Genotype                 | n   | Mean<br>Lifespan | 25%<br>dead   | 75%<br>dead   | ChiSquare |          | p-value  |          |
|------------|---------|--------------------------|-----|------------------|---------------|---------------|-----------|----------|----------|----------|
|            |         |                          |     |                  |               |               | Log Rank  | Wilcoxon | Log Rank | Wilcoxon |
| A          | Males   | + > Foxo                 | 30  | 53.9             | 51            | 61            | 41.7      | 36.2     | <0.0001  | <0.0001  |
|            |         | esgGal4 > Foxo           | 34  | 35.6             | 29            | 47            |           |          |          |          |
|            |         | <i>percent extension</i> |     | <b>-33.9%</b>    | <b>-43.1%</b> | <b>-22.9%</b> |           |          |          |          |
|            | Females | + > Foxo                 | 41  | 58.7             | 53            | 67            | 9.5       | 13.3     | 0.002    | 0.0003   |
|            |         | esgGal4 > Foxo           | 43  | 47.1             | 37            | 61            |           |          |          |          |
|            |         | <i>percent extension</i> |     | <b>-19.8%</b>    | <b>-30.2%</b> | <b>-8.9%</b>  |           |          |          |          |
| B          | Males   | + > Foxo                 | 35  | 53.5             | 55            | 59            | 49.6      | 36.3     | <0.0001  | <0.0001  |
|            |         | esgGal4 > Foxo           | 46  | 38.7             | 35            | 47            |           |          |          |          |
|            |         | <i>percent extension</i> |     | <b>-27.7%</b>    | <b>-36.3%</b> | <b>-20.3%</b> |           |          |          |          |
|            | Females | + > Foxo                 | 22  | 60.7             | 53            | 75            | 0.2       | 0.1      | 0.64     | 0.82     |
|            |         | esgGal4 > Foxo           | 28  | 60.3             | 55            | 71            |           |          |          |          |
|            |         | <i>percent extension</i> |     | <b>-0.6%</b>     | <b>+3.7%</b>  | <b>-5.3%</b>  |           |          |          |          |
| C          | Males   | + > Foxo                 | 42  | 48.6             | 43            | 55            | 18.9      | 19.6     | <0.0001  | <0.0001  |
|            |         | esgGal4 > Foxo           | 54  | 40.7             | 37            | 47            |           |          |          |          |
|            |         | <i>percent extension</i> |     | <b>-16.3%</b>    | <b>-13.9%</b> | <b>-14.5%</b> |           |          |          |          |
|            | Females | + > Foxo                 | 41  | 52.9             | 47            | 65            | 2.2       | 3.8      | 0.14     | 0.05     |
|            |         | esgGal4 > Foxo           | 46  | 48.9             | 39            | 57            |           |          |          |          |
|            |         | <i>percent extension</i> |     | <b>-7.6%</b>     | <b>-17%</b>   | <b>-12.3%</b> |           |          |          |          |
| D          | Males   | + > Foxo                 | 43  | 49.4             | 47            | 59            | 60.9      | 46       | <0.0001  | <0.0001  |
|            |         | esgGal4 > Foxo           | 43  | 34.5             | 29            | 41            |           |          |          |          |
|            |         | <i>percent extension</i> |     | <b>-30.2%</b>    | <b>-38.3%</b> | <b>-30.5%</b> |           |          |          |          |
|            | Females | + > Foxo                 | 36  | 55.7             | 55            | 63            | 16        | 18       | <0.0001  | <0.0001  |
|            |         | esgGal4 > Foxo           | 41  | 45               | 45            | 53            |           |          |          |          |
|            |         | <i>percent extension</i> |     | <b>-19.2%</b>    | <b>-18.2%</b> | <b>-15.9%</b> |           |          |          |          |
| E          | Males   | + > Foxo                 | 39  | 49.8             | 49            | 59            | 41        | 31.3     | <0.0001  | <0.0001  |
|            |         | esgGal4 > Foxo           | 40  | 37.2             | 35            | 43            |           |          |          |          |
|            |         | <i>percent extension</i> |     | <b>-25.3%</b>    | <b>-28.6%</b> | <b>-27.1%</b> |           |          |          |          |
|            | Females | + > Foxo                 | 40  | 53.5             | 53            | 63            | 9.1       | 9.9      | 0.002    | 0.001    |
|            |         | esgGal4 > Foxo           | 37  | 48.1             | 45            | 53            |           |          |          |          |
|            |         | <i>percent extension</i> |     | <b>-10.1%</b>    | <b>-15.1%</b> | <b>-15.9%</b> |           |          |          |          |
| Total      | Males   | + > Foxo                 | 189 | 50.8             | 47            | 59            | 191.4     | 156.7    | <0.0001  | <0.0001  |
|            |         | esgGal4 > Foxo           | 217 | 37.6             | 33            | 45            |           |          |          |          |
|            |         | <i>percent extension</i> |     | <b>-26.0%</b>    | <b>-29.8%</b> | <b>-23.7%</b> |           |          |          |          |
|            | Females | + > Foxo                 | 179 | 55.7             | 53            | 65            | 24.2      | 32       | <0.0001  | <0.0001  |
|            |         | esgGal4 > Foxo           | 192 | 48.6             | 43            | 57            |           |          |          |          |
|            |         | <i>percent extension</i> |     | <b>-12.7%</b>    | <b>-18.9%</b> | <b>-12.3%</b> |           |          |          |          |
