# Supplementary material for: Lifespan Extension by Preserving Proliferative Homeostasis in Drosophila
Source: PubMed Central journal article supplement (PMC2954830; doi:10.1371/journal.pgen.1001159), 2010-10-14
Supplement: pgen.1001159.s013.pdf [file pgen.1001159.s013.pdf]

5961 GeneSwitch > + (w<sup>1118</sup>)

| Population Drug          | n          | Mean Lifespan | 25% dead     | Median Lifespan | 75% dead    | ChiSquare  |            | p-value      |             |
|--------------------------|------------|---------------|--------------|-----------------|-------------|------------|------------|--------------|-------------|
|                          |            |               |              |                 |             | Log Rank   | Wilcoxon   | Log Rank     | Wilcoxon    |
| A -RU486                 | 71         | 60.6          | 56           | 66              | 73          | 7.7        | 3.5        | 0.006        | 0.06        |
| +RU486                   | 73         | 64.6          | 59           | 68              | 73          |            |            |              |             |
| <i>percent extension</i> |            | <b>6.6%</b>   | <b>5.4%</b>  | <b>3.0%</b>     | <b>0.0%</b> |            |            |              |             |
| B -RU486                 | 93         | 56.9          | 49           | 59              | 68          | 5.7        | 5.9        | 0.01         | 0.01        |
| +RU486                   | 87         | 61            | 54           | 66              | 73          |            |            |              |             |
| <i>percent extension</i> |            | <b>7.2%</b>   | <b>10.2%</b> | <b>11.9%</b>    | <b>7.4%</b> |            |            |              |             |
| C -RU486                 | 80         | 66.9          | 61           | 73              | 79          | 2.6        | 0.7        | 0.1          | 0.4         |
| +RU486                   | 79         | 69.1          | 61           | 73              | 79          |            |            |              |             |
| <i>percent extension</i> |            | <b>3.3%</b>   | <b>0.0%</b>  | <b>0.0%</b>     | <b>0.0%</b> |            |            |              |             |
| D -RU486                 | 76         | 68.9          | 61           | 76              | 79          | 0.3        | 0          | 0.55         | 0.96        |
| +RU486                   | 70         | 69.3          | 64           | 73              | 79          |            |            |              |             |
| <i>percent extension</i> |            | <b>0.6%</b>   | <b>4.9%</b>  | <b>-3.9%</b>    | <b>0.0%</b> |            |            |              |             |
| <b>Total -RU486</b>      | <b>320</b> | <b>63.1</b>   | <b>54</b>    | <b>67</b>       | <b>75</b>   | <b>7.5</b> | <b>4.5</b> | <b>0.006</b> | <b>0.03</b> |
| <b>+RU486</b>            | <b>309</b> | <b>65.8</b>   | <b>59</b>    | <b>68</b>       | <b>76</b>   |            |            |              |             |
| <i>percent extension</i> |            | <b>4.3%</b>   | <b>9.3%</b>  | <b>1.5%</b>     | <b>1.3%</b> |            |            |              |             |

5961 GeneSwitch &gt; + (OreR)

|                          |            |             |              |             |             |             |             |                   |                   |
|--------------------------|------------|-------------|--------------|-------------|-------------|-------------|-------------|-------------------|-------------------|
| A -RU486                 | 133        | 65.8        | 61           | 68          | 71          | 15.3        | 20.9        | <0.0001           | <0.0001           |
| +RU486                   | 132        | 68.9        | 68           | 71          | 71          |             |             |                   |                   |
| <i>percent extension</i> |            | <b>4.7%</b> | <b>11.5%</b> | <b>4.4%</b> | <b>0.0%</b> |             |             |                   |                   |
| B -RU486                 | 117        | 65.9        | 61           | 68          | 71          | 4.8         | 4.7         | 0.03              | 0.03              |
| +RU486                   | 126        | 66.3        | 64           | 68          | 74          |             |             |                   |                   |
| <i>percent extension</i> |            | <b>0.6%</b> | <b>4.9%</b>  | <b>0.0%</b> | <b>4.2%</b> |             |             |                   |                   |
| C -RU486                 | 166        | 65.4        | 62           | 66          | 72          | 15.6        | 17.4        | <0.0001           | <0.0001           |
| +RU486                   | 154        | 68.5        | 66           | 72          | 72          |             |             |                   |                   |
| <i>percent extension</i> |            | <b>4.7%</b> | <b>6.5%</b>  | <b>9.1%</b> | <b>0.0%</b> |             |             |                   |                   |
| <b>Total -RU486</b>      | <b>416</b> | <b>65.7</b> | <b>62</b>    | <b>68</b>   | <b>71</b>   | <b>30.9</b> | <b>39.6</b> | <b>&lt;0.0001</b> | <b>&lt;0.0001</b> |
| <b>+RU486</b>            | <b>412</b> | <b>67.9</b> | <b>66</b>    | <b>69</b>   | <b>72</b>   |             |             |                   |                   |
| <i>percent extension</i> |            | <b>3.3%</b> | <b>6.5%</b>  | <b>1.5%</b> | <b>1.4%</b> |             |             |                   |                   |

5961 GeneSwitch > Dp110<sup>DN</sup>

| Population Drug          | n          | Mean Lifespan | 25% dead     | Median Lifespan | 75% dead     | ChiSquare    |             | p-value           |                   |
|--------------------------|------------|---------------|--------------|-----------------|--------------|--------------|-------------|-------------------|-------------------|
|                          |            |               |              |                 |              | Log Rank     | Wilcoxon    | Log Rank          | Wilcoxon          |
| A -RU486                 | 75         | 75.7          | 75           | 75              | 80           | 17           | 10.8        | <0.0001           | <0.0001           |
| +RU486                   | 72         | 78.1          | 75           | 80              | 84           |              |             |                   |                   |
| <i>percent extension</i> |            | <b>3.2%</b>   | <b>0.0%</b>  | <b>6.7%</b>     | <b>5.0%</b>  |              |             |                   |                   |
| B -RU486                 | 79         | 81.4          | 79           | 83              | 85           | 66.4         | 60          | <0.0001           | <0.0001           |
| +RU486                   | 75         | 89.1          | 87           | 92              | 94           |              |             |                   |                   |
| <i>percent extension</i> |            | <b>9.5%</b>   | <b>10.1%</b> | <b>10.8%</b>    | <b>10.6%</b> |              |             |                   |                   |
| C -RU486                 | 79         | 80.8          | 79           | 81              | 83           | 85.4         | 70.2        | <0.0001           | <0.0001           |
| +RU486                   | 72         | 88.2          | 87           | 92              | 92           |              |             |                   |                   |
| <i>percent extension</i> |            | <b>9.2%</b>   | <b>10.1%</b> | <b>13.6%</b>    | <b>10.8%</b> |              |             |                   |                   |
| <b>Total -RU486</b>      | <b>233</b> | <b>79.4</b>   | <b>76</b>    | <b>80</b>       | <b>83</b>    | <b>126.2</b> | <b>95.4</b> | <b>&lt;0.0001</b> | <b>&lt;0.0001</b> |
| <b>+RU486</b>            | <b>219</b> | <b>85.2</b>   | <b>81</b>    | <b>89</b>       | <b>92</b>    |              |             |                   |                   |
| <i>percent extension</i> |            | <b>7.3%</b>   | <b>6.6%</b>  | <b>11.3%</b>    | <b>10.8%</b> |              |             |                   |                   |

5961 GeneSwitch > InR<sup>DN</sup>

|                          |            |              |              |              |              |             |           |                   |                   |
|--------------------------|------------|--------------|--------------|--------------|--------------|-------------|-----------|-------------------|-------------------|
| A -RU486                 | 32         | 69.5         | 75           | 80           | 80           | 11.2        | 17.6      | 0.0008            | <0.0001           |
| +RU486                   | 38         | 80.4         | 82           | 84           | 89           |             |           |                   |                   |
| <i>percent extension</i> |            | <b>15.7%</b> | <b>9.3%</b>  | <b>5.0%</b>  | <b>11.3%</b> |             |           |                   |                   |
| B -RU486                 | 67         | 79.5         | 79           | 79           | 90           | 27.8        | 32.1      | <0.0001           | <0.0001           |
| +RU486                   | 79         | 86.7         | 85           | 90           | 92           |             |           |                   |                   |
| <i>percent extension</i> |            | <b>9.1%</b>  | <b>7.6%</b>  | <b>13.9%</b> | <b>2.2%</b>  |             |           |                   |                   |
| C -RU486                 | 78         | 83           | 79           | 83           | 87           | 20.7        | 16        | <0.0001           | <0.0001           |
| +RU486                   | 87         | 86.6         | 79           | 90           | 94           |             |           |                   |                   |
| <i>percent extension</i> |            | <b>4.3%</b>  | <b>0.0%</b>  | <b>8.4%</b>  | <b>8.0%</b>  |             |           |                   |                   |
| D -RU486                 | 90         | 83.5         | 79           | 83           | 90           | 27.7        | 32.1      | <0.0001           | <0.0001           |
| +RU486                   | 88         | 88.5         | 87           | 90           | 92           |             |           |                   |                   |
| <i>percent extension</i> |            | <b>6.0%</b>  | <b>10.1%</b> | <b>8.4%</b>  | <b>2.2%</b>  |             |           |                   |                   |
| <b>Total -RU486</b>      | <b>267</b> | <b>80.6</b>  | <b>79</b>    | <b>81</b>    | <b>87</b>    | <b>80.9</b> | <b>85</b> | <b>&lt;0.0001</b> | <b>&lt;0.0001</b> |
| <b>+RU486</b>            | <b>292</b> | <b>86.4</b>  | <b>83</b>    | <b>90</b>    | <b>92</b>    |             |           |                   |                   |
| <i>percent extension</i> |            | <b>7.2%</b>  | <b>5.1%</b>  | <b>11.1%</b> | <b>5.7%</b>  |             |           |                   |                   |

5961 GeneSwitch > Akt<sup>RNAi</sup>

|                          |            |              |              |              |              |              |              |                   |                   |
|--------------------------|------------|--------------|--------------|--------------|--------------|--------------|--------------|-------------------|-------------------|
| A -RU486                 | 75         | 66.7         | 66           | 70           | 75           | 80.6         | 63.6         | <0.0001           | <0.0001           |
| +RU486                   | 72         | 77.5         | 77           | 82           | 87           |              |              |                   |                   |
| <i>percent extension</i> |            | <b>16.2%</b> | <b>16.7%</b> | <b>17.1%</b> | <b>16.0%</b> |              |              |                   |                   |
| B -RU486                 | 84         | 68.7         | 66           | 73           | 75           | 11.9         | 2.9          | 0.0006            | 0.086             |
| +RU486                   | 83         | 69.5         | 63           | 75           | 77           |              |              |                   |                   |
| <i>percent extension</i> |            | <b>1.2%</b>  | <b>-4.5%</b> | <b>2.7%</b>  | <b>2.7%</b>  |              |              |                   |                   |
| C -RU486                 | 114        | 70           | 67           | 70           | 73           | 105.3        | 98.5         | <0.0001           | <0.0001           |
| +RU486                   | 106        | 79           | 76           | 81           | 83           |              |              |                   |                   |
| <i>percent extension</i> |            | <b>12.9%</b> | <b>13.4%</b> | <b>15.7%</b> | <b>13.7%</b> |              |              |                   |                   |
| D -RU486                 | 115        | 62.5         | 58           | 64           | 70           | 51.6         | 54.4         | <0.0001           | <0.0001           |
| +RU486                   | 109        | 71.1         | 67           | 73           | 76           |              |              |                   |                   |
| <i>percent extension</i> |            | <b>13.8%</b> | <b>15.5%</b> | <b>14.1%</b> | <b>8.6%</b>  |              |              |                   |                   |
| E -RU486                 | 72         | 69.4         | 67           | 73           | 76           | 32.4         | 26.7         | <0.0001           | <0.0001           |
| +RU486                   | 65         | 74.3         | 73           | 79           | 81           |              |              |                   |                   |
| <i>percent extension</i> |            | <b>7.1%</b>  | <b>9.0%</b>  | <b>8.2%</b>  | <b>6.6%</b>  |              |              |                   |                   |
| <b>Total -RU486</b>      | <b>453</b> | <b>67.2</b>  | <b>66</b>    | <b>70</b>    | <b>73</b>    | <b>244.4</b> | <b>180.6</b> | <b>&lt;0.0001</b> | <b>&lt;0.0001</b> |
| <b>+RU486</b>            | <b>442</b> | <b>74.3</b>  | <b>73</b>    | <b>77</b>    | <b>81</b>    |              |              |                   |                   |
| <i>percent extension</i> |            | <b>10.6%</b> | <b>10.6%</b> | <b>10.0%</b> | <b>11.0%</b> |              |              |                   |                   |

5961 GeneSwitch > Bsk<sup>DN</sup>

| Population Drug | <i>n</i>                 | Mean Lifespan | 25% dead    | Median Lifespan | 75% dead  | ChiSquare |             | p-value     |                   |                   |
|-----------------|--------------------------|---------------|-------------|-----------------|-----------|-----------|-------------|-------------|-------------------|-------------------|
|                 |                          |               |             |                 |           | Log Rank  | Wilcoxon    | Log Rank    | Wilcoxon          |                   |
| A               | -RU486                   | 73            | 60.7        | 55              | 64        | 73        | 17.1        | 12.7        | <0.0001           | 0.0004            |
|                 | +RU486                   | 70            | 68.2        | 64              | 73        | 78        |             |             |                   |                   |
|                 | <i>percent extension</i> |               | 12.4%       | 16.4%           | 14.1%     | 6.8%      |             |             |                   |                   |
| B               | -RU486                   | 79            | 66.5        | 64              | 67        | 73        | 33.7        | 36.3        | <0.0001           | 0.0004            |
|                 | +RU486                   | 79            | 76.3        | 73              | 76        | 87        |             |             |                   |                   |
|                 | <i>percent extension</i> |               | 14.7%       | 14.1%           | 13.4%     | 19.2%     |             |             |                   |                   |
| C               | -RU486                   | 104           | 45.7        | 42              | 44        | 49        | 67.8        | 47.7        | <0.0001           | 0.0004            |
|                 | +RU486                   | 105           | 55.1        | 47              | 54        | 63        |             |             |                   |                   |
|                 | <i>percent extension</i> |               | 20.6%       | 11.9%           | 22.7%     | 28.6%     |             |             |                   |                   |
| D               | -RU486                   | 85            | 42.3        | 37              | 42        | 47        | 17.5        | 10.5        | <0.0001           | 0.0001            |
|                 | +RU486                   | 82            | 47.4        | 40              | 47        | 56        |             |             |                   |                   |
|                 | <i>percent extension</i> |               | 12.1%       | 8.1%            | 11.9%     | 19.1%     |             |             |                   |                   |
| <b>Total</b>    | <b>-RU486</b>            | <b>341</b>    | <b>54.1</b> | <b>44</b>       | <b>51</b> | <b>64</b> | <b>54.3</b> | <b>46.5</b> | <b>&lt;0.0001</b> | <b>&lt;0.0001</b> |
|                 | <b>+RU486</b>            | <b>340</b>    | <b>61.6</b> | <b>51</b>       | <b>63</b> | <b>75</b> |             |             |                   |                   |
|                 | <i>percent extension</i> |               | 13.9%       | 15.9%           | 23.5%     | 17.2%     |             |             |                   |                   |

5961 GeneSwitch > Bsk<sup>RMAI</sup>

|              |                          |            |             |           |           |           |             |             |                   |                   |
|--------------|--------------------------|------------|-------------|-----------|-----------|-----------|-------------|-------------|-------------------|-------------------|
| A            | -RU486                   | 77         | 63.6        | 64        | 70        | 73        | 9.5         | 7           | 0.002             | 0.008             |
|              | +RU486                   | 81         | 66.8        | 64        | 70        | 76        |             |             |                   |                   |
|              | <i>percent extension</i> |            | 5.0%        | 0.0%      | 0.0%      | 4.1%      |             |             |                   |                   |
| B            | -RU486                   | 128        | 51.7        | 44        | 54        | 56        | 52.3        | 24.3        | <0.0001           | <0.0001           |
|              | +RU486                   | 107        | 54.2        | 49        | 58        | 63        |             |             |                   |                   |
|              | <i>percent extension</i> |            | 4.8%        | 11.4%     | 7.4%      | 12.5%     |             |             |                   |                   |
| C            | -RU486                   | 105        | 47.5        | 42        | 49        | 54        | 90          | 69.1        | <0.0001           | <0.0001           |
|              | +RU486                   | 110        | 57.5        | 54        | 58        | 65        |             |             |                   |                   |
|              | <i>percent extension</i> |            | 21.1%       | 28.6%     | 18.4%     | 20.4%     |             |             |                   |                   |
| D            | -RU486                   | 112        | 36.2        | 30        | 37        | 42        | 42.3        | 31.8        | <0.0001           | <0.0001           |
|              | +RU486                   | 113        | 42.6        | 37        | 42        | 49        |             |             |                   |                   |
|              | <i>percent extension</i> |            | 17.7%       | 23.3%     | 13.5%     | 16.7%     |             |             |                   |                   |
| <b>Total</b> | <b>-RU486</b>            | <b>422</b> | <b>48.7</b> | <b>40</b> | <b>49</b> | <b>56</b> | <b>41.3</b> | <b>38.5</b> | <b>&lt;0.0001</b> | <b>&lt;0.0001</b> |
|              | <b>+RU486</b>            | <b>411</b> | <b>54.4</b> | <b>42</b> | <b>56</b> | <b>65</b> |             |             |                   |                   |
|              | <i>percent extension</i> |            | 11.7%       | 5.0%      | 14.3%     | 16.1%     |             |             |                   |                   |
