# Supplementary material for: Lifespan Extension by Preserving Proliferative Homeostasis in Drosophila
Source: PubMed Central journal article supplement (PMC2954830; doi:10.1371/journal.pgen.1001159), 2010-10-14
Supplement: pgen.1001159.s014.pdf [file pgen.1001159.s014.pdf]

| Population        | Sex     | Genotype                   | n                          | Mean Lifespan | 25% dead | Median Lifespan | 75% dead | ChiSquare |          | p-value  |          |         |
|-------------------|---------|----------------------------|----------------------------|---------------|----------|-----------------|----------|-----------|----------|----------|----------|---------|
|                   |         |                            |                            |               |          |                 |          | Log Rank  | Wilcoxon | Log Rank | Wilcoxon |         |
| esgGFP > Jafracl1 | A       | Males                      | esgGal4,UAS-GFP > +        | 217           | 48.5     | 42              | 51       | 57        | 21.9     | 12.1     | <0.0001  | 0.0005  |
|                   |         |                            | esgGal4,UAS-GFP > Jafracl1 | 205           | 52.7     | 48              | 54       | 63        |          |          |          |         |
|                   |         | <i>percent extension</i>   |                            | 8.7%          | 14.3%    | 5.9%            | 10.5%    |           |          |          |          |         |
|                   | Females | esgGal4,UAS-GFP > +        | 233                        | 43.5          | 36       | 45              | 54       | 58.5      | 61.6     | <0.0001  | <0.0001  |         |
|                   |         | esgGal4,UAS-GFP > Jafracl1 | 250                        | 54.8          | 45       | 57              | 66       |           |          |          |          |         |
|                   |         | <i>percent extension</i>   |                            | 26.0%         | 25.0%    | 26.7%           | 22.2%    |           |          |          |          |         |
|                   | B       | Males                      | esgGal4,UAS-GFP > +        | 117           | 47.1     | 42              | 51       | 57        | 10.2     | 13.7     | 0.0014   | 0.0002  |
|                   |         |                            | esgGal4,UAS-GFP > Jafracl1 | 101           | 54.3     | 45              | 57       | 63        |          |          |          |         |
|                   |         |                            | <i>percent extension</i>   |               | 15.3%    | 7.1%            | 11.8%    | 10.5%     |          |          |          |         |
|                   |         | Females                    | esgGal4,UAS-GFP > +        | 119           | 51.2     | 39              | 51       | 66        | 16.2     | 18.5     | <0.0001  | <0.0001 |
|                   |         |                            | esgGal4,UAS-GFP > Jafracl1 | 123           | 59.9     | 54              | 63       | 72        |          |          |          |         |
|                   |         |                            | <i>percent extension</i>   |               | 17.0%    | 38.5%           | 23.5%    | 9.1%      |          |          |          |         |
| C                 | Males   | esgGal4,UAS-GFP > +        | 141                        | 47.2          | 42       | 48              | 57       | 33.4      | 26.4     | <0.0001  | <0.0001  |         |
|                   |         | esgGal4,UAS-GFP > Jafracl1 | 75                         | 55.4          | 51       | 63              | 69       |           |          |          |          |         |
|                   |         | <i>percent extension</i>   |                            | 17.4%         | 21.4%    | 31.3%           | 21.1%    |           |          |          |          |         |
|                   | Females | esgGal4,UAS-GFP > +        | 139                        | 51.2          | 39       | 57              | 66       | 22.6      | 26       | <0.0001  | <0.0001  |         |
|                   |         | esgGal4,UAS-GFP > Jafracl1 | 76                         | 63            | 57       | 69              | 75       |           |          |          |          |         |
|                   |         | <i>percent extension</i>   |                            | 23.0%         | 46.2%    | 21.1%           | 13.6%    |           |          |          |          |         |
| Total             | Males   | esgGal4,UAS-GFP > +        | 475                        | 47.8          | 42       | 51              | 57       | 61.5      | 47.9     | <0.0001  | <0.0001  |         |
|                   |         | esgGal4,UAS-GFP > Jafracl1 | 381                        | 53.6          | 48       | 57              | 66       |           |          |          |          |         |
|                   |         | <i>percent extension</i>   |                            | 12.1%         | 14.3%    | 11.8%           | 15.8%    |           |          |          |          |         |
|                   | Females | esgGal4,UAS-GFP > +        | 491                        | 47.6          | 36       | 48              | 60       | 70.8      | 85.5     | <0.0001  | <0.0001  |         |
|                   |         | esgGal4,UAS-GFP > Jafracl1 | 449                        | 57            | 48       | 60              | 69       |           |          |          |          |         |
|                   |         | <i>percent extension</i>   |                            | 19.7%         | 33.3%    | 25.0%           | 15.0%    |           |          |          |          |         |

|                |         |                          |                          |       |       |       |       |       |       |         |         |         |
|----------------|---------|--------------------------|--------------------------|-------|-------|-------|-------|-------|-------|---------|---------|---------|
| esgGFP > Hsp68 | A       | Males                    | esgGal4,UAS-GFP > +      | 94    | 50.6  | 42    | 54    | 60    | 25.4  | 19.5    | <0.0001 | <0.0001 |
|                |         |                          | esgGal4,UAS-GFP > Hsp68  | 102   | 56.7  | 51    | 60    | 69    |       |         |         |         |
|                |         | <i>percent extension</i> |                          | 12.1% | 21.4% | 11.1% | 15.0% |       |       |         |         |         |
|                | Females | esgGal4,UAS-GFP > +      | 121                      | 53.1  | 42    | 54    | 66    | 61    | 41.5  | <0.0001 | <0.0001 |         |
|                |         | esgGal4,UAS-GFP > Hsp68  | 101                      | 65.4  | 60    | 75    | 81    |       |       |         |         |         |
|                |         | <i>percent extension</i> |                          | 23.2% | 42.9% | 38.9% | 22.7% |       |       |         |         |         |
|                | B       | Males                    | esgGal4,UAS-GFP > +      | 86    | 50    | 45    | 54    | 60    | 36.4  | 42.5    | <0.0001 | <0.0001 |
|                |         |                          | esgGal4,UAS-GFP > Hsp68  | 91    | 62.1  | 57    | 63    | 69    |       |         |         |         |
|                |         |                          | <i>percent extension</i> |       | 24.2% | 26.7% | 16.7% | 15.0% |       |         |         |         |
|                |         | Females                  | esgGal4,UAS-GFP > +      | 91    | 61    | 54    | 66    | 72    | 77.8  | 66.2    | <0.0001 | <0.0001 |
|                |         |                          | esgGal4,UAS-GFP > Hsp68  | 116   | 75    | 69    | 78    | 84    |       |         |         |         |
|                |         |                          | <i>percent extension</i> |       | 23.0% | 27.8% | 18.2% | 16.7% |       |         |         |         |
| C              | Males   | esgGal4,UAS-GFP > +      | 120                      | 50.3  | 45    | 51    | 60    | 69.7  | 56    | <0.0001 | <0.0001 |         |
|                |         | esgGal4,UAS-GFP > Hsp68  | 125                      | 60.5  | 57    | 66    | 72    |       |       |         |         |         |
|                |         | <i>percent extension</i> |                          | 20.3% | 26.7% | 29.4% | 20.0% |       |       |         |         |         |
|                | Females | esgGal4,UAS-GFP > +      | 122                      | 53    | 42    | 54    | 63    | 63.4  | 44.7  | <0.0001 | <0.0001 |         |
|                |         | esgGal4,UAS-GFP > Hsp68  | 104                      | 65.8  | 57    | 72    | 81    |       |       |         |         |         |
|                |         | <i>percent extension</i> |                          | 24.2% | 35.7% | 33.3% | 28.6% |       |       |         |         |         |
| Total          | Males   | esgGal4,UAS-GFP > +      | 300                      | 50.3  | 42    | 51    | 60    | 131.7 | 116   | <0.0001 | <0.0001 |         |
|                |         | esgGal4,UAS-GFP > Hsp68  | 318                      | 59.7  | 54    | 63    | 69    |       |       |         |         |         |
|                |         | <i>percent extension</i> |                          | 18.7% | 28.6% | 23.5% | 15.0% |       |       |         |         |         |
|                | Females | esgGal4,UAS-GFP > +      | 334                      | 55.2  | 45    | 57    | 66    | 211.4 | 157.1 | <0.0001 | <0.0001 |         |
|                |         | esgGal4,UAS-GFP > Hsp68  | 321                      | 69    | 63    | 75    | 81    |       |       |         |         |         |
|                |         | <i>percent extension</i> |                          | 25.0% | 40.0% | 31.6% | 22.7% |       |       |         |         |         |
