# Supplementary material for: Lifespan Extension by Preserving Proliferative Homeostasis in Drosophila
Source: PubMed Central journal article supplement (PMC2954830; doi:10.1371/journal.pgen.1001159), 2010-10-14
Supplement: pgen.1001159.s015.pdf [file pgen.1001159.s015.pdf]

| Population | Drug                     | n   | Mean Lifespan | 25% dead | Median Lifespan | 75% dead | ChiSquare |          | p-value  |          |
|------------|--------------------------|-----|---------------|----------|-----------------|----------|-----------|----------|----------|----------|
|            |                          |     |               |          |                 |          | Log Rank  | Wilcoxon | Log Rank | Wilcoxon |
| A          | -RU486                   | 51  | 66.4          | 68       | 75              | 77       | 10.8      | 15.4     | 0.001    | <0.0001  |
|            | +RU486                   | 45  | 74.8          | 77       | 80              | 82       |           |          |          |          |
|            | <i>percent extension</i> |     | 12.7%         | 13.2%    | 6.7%            | 6.5%     |           |          |          |          |
| B          | -RU486                   | 91  | 79            | 79       | 85              | 85       | 52        | 42       | <0.0001  | <0.0001  |
|            | +RU486                   | 95  | 87.9          | 85       | 87              | 92       |           |          |          |          |
|            | <i>percent extension</i> |     | 11.3%         | 7.6%     | 2.4%            | 8.2%     |           |          |          |          |
| C          | -RU486                   | 60  | 82.6          | 81       | 83              | 85       | 12.8      | 12.4     | 0.0003   | 0.0004   |
|            | +RU486                   | 61  | 85.3          | 83       | 85              | 90       |           |          |          |          |
|            | <i>percent extension</i> |     | 3.3%          | 2.5%     | 2.4%            | 5.9%     |           |          |          |          |
| Total      | -RU486                   | 203 | 76.9          | 75       | 81              | 85       | 54.8      | 49.4     | <0.0001  | <0.0001  |
|            | +RU486                   | 200 | 84.2          | 80       | 85              | 90       |           |          |          |          |
|            | <i>percent extension</i> |     | 9.5%          | 6.7%     | 4.9%            | 5.9%     |           |          |          |          |
